# Supplementary material
Source: MDPI journal article supplement (https://www.mdpi.com/2079-6412/13/8/1458)
Supplement: s1 [file s1]

# Breaking through the Thermodynamics “Wilds” of Metal–Organic Chemical Vapor Deposition Precursors: Metal *tris*-Acetylacetonates

Alexander M. Makarenko, Sergey V. Trubin and Kseniya V. Zherikova \*

Nikolaev Institute of Inorganic Chemistry, Siberian Branch of Russian Academy of Sciences, 630090 Novosibirsk, Russia; alexmakarenko@niic.nsc.ru (A.M.M.); trubin@niic.nsc.ru (S.V.T.)

\* Correspondence: ksenia@niic.nsc.ru

**Table S1.** Saturated vapor pressures of Al(acac)<sub>3</sub>, Cr(acac)<sub>3</sub>, and In(acac)<sub>3</sub> obtained by the transpiration method:  $p_i$  – from the experimental data and  $p_{calc}$  – from the corresponding equation ( $p_{ref} = 1$  Pa, standard uncertainty  $u(p_i) = 0.05 \cdot p_i$ ).

| $T, K^a$                                                                                       | $P_a, Pa^b$ | $m, mg^c$ | $v(Ar/N_2), dm^3 h^{-1} d$ | $V(Ar/N_2), dm^3_e$ | $T_a, K^c$ | $p_i, Pa$ | $p_{calc}, Pa$ |
|------------------------------------------------------------------------------------------------|-------------|-----------|----------------------------|---------------------|------------|-----------|----------------|
| Al(acac) <sub>3</sub> , $P_{21}/c$                                                             |             |           |                            |                     |            |           |                |
| series 1 (NIIC SB RAS)                                                                         |             |           |                            |                     |            |           |                |
| $\ln(p/p_{ref}) = \frac{399.8}{R} - \frac{144677.5}{RT} - \frac{65.2}{R} \ln \frac{T}{298.15}$ |             |           |                            |                     |            |           |                |
| 421.0                                                                                          | 100525      | 7.38      | 3.733                      | 0.933               | 295.2      | 59.8      | 56.8           |
| 425.3                                                                                          | 100525      | 9.84      | 3.719                      | 0.930               | 295.2      | 80.0      | 79.7           |
| 456.1                                                                                          | 101325      | 25.73     | 1.040                      | 0.260               | 295.2      | 743       | 730            |
| 460.0                                                                                          | 101325      | 31.89     | 1.035                      | 0.259               | 295.2      | 924       | 944            |
| 422.5                                                                                          | 101325      | 11.43     | 4.050                      | 1.38                | 295.2      | 62.5      | 64.0           |
| 440.0                                                                                          | 101325      | 16.12     | 2.000                      | 0.500               | 295.2      | 243       | 240            |
| 382.0                                                                                          | 102792      | 16.44     | 4.063                      | 71.1                | 295.7      | 1.75      | 1.79           |
| 418.3                                                                                          | 101325      | 11.98     | 4.005                      | 2.00                | 295.2      | 45.3      | 45.8           |
| 428.1                                                                                          | 101325      | 12.67     | 4.004                      | 1.00                | 295.2      | 95.7      | 98.9           |
| 436.8                                                                                          | 101325      | 12.97     | 2.134                      | 0.534               | 295.2      | 184       | 190            |
| 398.8                                                                                          | 101058      | 10.72     | 4.004                      | 9.01                | 295.2      | 9.00      | 8.70           |
| 405.3                                                                                          | 100258      | 10.24     | 4.002                      | 5.00                | 295.2      | 15.5      | 15.4           |
| 448.9                                                                                          | 100258      | 30.59     | 2.021                      | 0.505               | 295.2      | 456       | 449            |
| 379.2                                                                                          | 101325      | 12.50     | 4.005                      | 72.1                | 295.2      | 1.31      | 1.35           |
| 386.7                                                                                          | 100792      | 10.06     | 4.003                      | 26.0                | 295.2      | 2.93      | 2.83           |
| series 2 (University of Rostock)                                                               |             |           |                            |                     |            |           |                |
| $\ln(p/p_{ref}) = \frac{393.4}{R} - \frac{142213.4}{RT} - \frac{65.2}{R} \ln \frac{T}{298.15}$ |             |           |                            |                     |            |           |                |
| 411.9                                                                                          | 99458       | 24.00     | 2.269                      | 6.96                | 295.2      | 26.1      | 26.0           |
| 425.0                                                                                          | 99458       | 14.42     | 2.269                      | 1.51                | 296.2      | 72.4      | 73.0           |
| 439.3                                                                                          | 99458       | 14.30     | 1.872                      | 0.499               | 296.2      | 218       | 210            |
| 381.6                                                                                          | 99992       | 15.70     | 4.160                      | 67.3                | 295.2      | 1.76      | 1.74           |
| 399.1                                                                                          | 99992       | 19.00     | 4.255                      | 17.1                | 295.2      | 8.41      | 8.82           |
| 416.7                                                                                          | 99992       | 15.50     | 4.119                      | 3.02                | 296.2      | 39.0      | 38.5           |
| 434.9                                                                                          | 102792      | 20.80     | 2.816                      | 1.03                | 296.2      | 153       | 153            |
| 394.0                                                                                          | 103058      | 13.90     | 4.240                      | 19.9                | 296.2      | 5.31      | 5.57           |
| 444.6                                                                                          | 103591      | 21.00     | 1.269                      | 0.529               | 295.2      | 301       | 304            |
| 454.9                                                                                          | 103591      | 33.10     | 1.235                      | 0.412               | 295.2      | 608       | 605            |
| 378.4                                                                                          | 103591      | 14.60     | 5.162                      | 82.0                | 294.2      | 1.34      | 1.28           |

| Cr(acac) <sub>3</sub> , P <sub>21/c</sub>                                                             |        |       |       |       |       |       |       |
|-------------------------------------------------------------------------------------------------------|--------|-------|-------|-------|-------|-------|-------|
| series 1 (NIIC SB RAS)                                                                                |        |       |       |       |       |       |       |
| $\ln(p/p_{\text{ref}}) = \frac{391.6}{R} - \frac{146931.9}{RT} - \frac{65.3}{R} \ln \frac{T}{298.15}$ |        |       |       |       |       |       |       |
| 471.7                                                                                                 | 101458 | 31.51 | 2.021 | 0.505 | 296.2 | 438   | 417   |
| 458.1                                                                                                 | 101458 | 12.22 | 2.007 | 0.502 | 296.2 | 171   | 173   |
| 465.0                                                                                                 | 101458 | 19.84 | 2.016 | 0.504 | 296.2 | 277   | 272   |
| 410.6                                                                                                 | 101458 | 12.40 | 4.010 | 18.0  | 295.2 | 4.83  | 4.70  |
| 407.7                                                                                                 | 101458 | 10.41 | 4.008 | 20.0  | 295.2 | 3.65  | 3.66  |
| 420.4                                                                                                 | 101458 | 11.79 | 4.006 | 8.01  | 295.2 | 10.3  | 10.7  |
| 444.2                                                                                                 | 101458 | 11.91 | 4.000 | 1.33  | 295.2 | 62.7  | 65.7  |
| 455.1                                                                                                 | 101458 | 12.52 | 2.503 | 0.626 | 295.2 | 140   | 141   |
| 477.0                                                                                                 | 101458 | 40.76 | 2.004 | 0.501 | 295.2 | 568   | 579   |
| 395.0                                                                                                 | 101458 | 10.97 | 4.006 | 67.1  | 295.2 | 1.15  | 1.16  |
| 400.9                                                                                                 | 101458 | 10.10 | 2.058 | 34.5  | 295.2 | 2.06  | 2.00  |
| series 2 (University of Rostock)                                                                      |        |       |       |       |       |       |       |
| $\ln(p/p_{\text{ref}}) = \frac{398.6}{R} - \frac{150436.4}{RT} - \frac{65.3}{R} \ln \frac{T}{298.15}$ |        |       |       |       |       |       |       |
| 400.8                                                                                                 | 101992 | 16.30 | 3.974 | 73.8  | 295.2 | 1.55  | 1.61  |
| 421.0                                                                                                 | 101725 | 21.30 | 4.769 | 14.9  | 295.2 | 10.0  | 9.53  |
| 440.4                                                                                                 | 101725 | 9.10  | 3.906 | 1.43  | 295.2 | 44.6  | 44.3  |
| 459.8                                                                                                 | 101725 | 12.10 | 1.600 | 0.482 | 295.2 | 176   | 179   |
| 470.2                                                                                                 | 99458  | 13.50 | 1.059 | 0.265 | 293.2 | 356   | 357   |
| In(acac) <sub>3</sub> , P <sub>bca</sub>                                                              |        |       |       |       |       |       |       |
| $\ln(p/p_{\text{ref}}) = \frac{411.1}{R} - \frac{153285.7}{RT} - \frac{65.1}{R} \ln \frac{T}{298.15}$ |        |       |       |       |       |       |       |
| 435.6                                                                                                 | 99992  | 13.24 | 3.934 | 1.31  | 294.2 | 59.9  | 63.3  |
| 412.5                                                                                                 | 103058 | 14.15 | 3.214 | 9.11  | 296.2 | 9.28  | 9.06  |
| 429.2                                                                                                 | 102792 | 13.11 | 3.225 | 2.15  | 296.2 | 36.42 | 37.8  |
| 407.9                                                                                                 | 103591 | 10.36 | 3.353 | 10.1  | 294.2 | 6.11  | 5.98  |
| 389.4                                                                                                 | 99992  | 10.33 | 1.286 | 59.3  | 295.2 | 1.04  | 1.00  |
| 384.2                                                                                                 | 100525 | 6.96  | 0.949 | 75.0  | 296.2 | 0.555 | 0.587 |
| 395.4                                                                                                 | 99992  | 9.51  | 1.293 | 32.3  | 296.2 | 1.76  | 1.83  |
| 399.4                                                                                                 | 100125 | 11.34 | 1.114 | 24.5  | 296.2 | 2.76  | 2.69  |
| 418.7                                                                                                 | 101992 | 10.44 | 3.091 | 3.86  | 295.2 | 16.1  | 15.63 |
| 423.6                                                                                                 | 101992 | 10.80 | 3.088 | 2.57  | 295.2 | 25.0  | 23.7  |

<sup>a</sup> Saturation temperature, standard uncertainty  $u(T) = 0.5$  K.

<sup>b</sup> Atmospheric pressure, standard uncertainty  $u(P_a) = 133$  Pa.

<sup>c</sup> Mass of transported compound cooled at the ambient temperature  $T_a$ , standard uncertainty  $u(m) = 5 \cdot 10^{-5}$  g.

<sup>d</sup> Velocity of argon or nitrogen flow, standard uncertainty  $u(v(\text{Ar})) = 0.02 \cdot v(\text{Ar})$ .

<sup>e</sup> Volume of the gas transported at the ambient temperature  $T_a$  and the atmospheric pressure  $P_a$  during experiments.

**Table S2.** The results of the vapor pressure measurements of the Al(acac)<sub>3</sub> by Knudsen effusion method with mass spectrometric registration of the gas phase composition:  $p_i$  – from the experimental data and  $p_{calc}$  – from the corresponding equation ( $p_{ref} = 1$  Pa). <sup>a</sup>.

| Al(acac) <sub>3</sub> , P2 <sub>1</sub> /c                                                     |                           |                              |
|------------------------------------------------------------------------------------------------|---------------------------|------------------------------|
| series 3 (NIIC SB RAS)                                                                         |                           |                              |
| $\ln(p/p_{ref}) = \frac{413.4}{R} - \frac{151052.1}{RT} - \frac{65.2}{R} \ln \frac{T}{298.15}$ |                           |                              |
| <i>T</i> , K                                                                                   | <i>p<sub>i</sub></i> , Pa | <i>p<sub>calc</sub></i> , Pa |
| 427.0                                                                                          | 80.4                      | 77.9                         |
| 429.0                                                                                          | 99.5                      | 91.6                         |
| 434.0                                                                                          | 130                       | 136                          |
| 382.0                                                                                          | 1.21                      | 1.24                         |
| 390.0                                                                                          | 3.07                      | 2.80                         |
| 402.0                                                                                          | 8.36                      | 8.87                         |
| 414.0                                                                                          | 24.1                      | 26.1                         |

<sup>a</sup> Standard uncertainty  $u$  is  $u(T) = 1.0$  K; relative standard uncertainty for vapor pressure  $u_r(p_i) = 0.10 \cdot p_i$ .

**Table S3.** Compilation of data on molar heat capacities  $C_{p,m}^o$  and heat capacity differences for *tris*(acetylacetonato)metal(III) complexes at 298.15 K (in J·K<sup>-1</sup>·mol<sup>-1</sup>) <sup>a</sup>

| .Complex              | $C_{p,m}^o(\text{cr})^a$      | $-\Delta_{\text{cr}}^g C_{p,m}^o{}^b$ | [M] <sup>c</sup>             | $C_{p,m}^o(\text{l})^d$ | $-\Delta_{\text{l}}^g C_{p,m}^o{}^e$ |
|-----------------------|-------------------------------|---------------------------------------|------------------------------|-------------------------|--------------------------------------|
| 1                     | 2                             | 3                                     | 4                            | 5                       | 6                                    |
| Al(acac) <sub>3</sub> | 429.6±0.6 [1]                 | 65.2                                  | 15.9                         | 460.6                   | 130.3                                |
| Cr(acac) <sub>3</sub> | 430.3±0.6 [1]                 | 65.3                                  | 16.6                         | 461.3                   | 130.5                                |
| Sc(acac) <sub>3</sub> | 425.1±0.9 [2]                 | -64.5                                 | 11.4                         | 456.1                   | 129.2                                |
| Fe(acac) <sub>3</sub> | 429.9±0.9 [3]                 | -65.2                                 | 16.2                         | 460.9                   | 130.4                                |
| Ir(acac) <sub>3</sub> | 423.34±1.1 [1]                | -64.2                                 | 9.6                          | 454.3                   | 128.7                                |
| V(acac) <sub>3</sub>  | 418.3±0.8 [2]                 | -63.5                                 | 4.6                          | 449.3                   | 127.4                                |
| Mn(acac) <sub>3</sub> | 424.5±0.8 [2]                 | -64.4                                 | 10.8                         | 455.5                   | 129.0                                |
| Co(acac) <sub>3</sub> | 409.0±0.8 [2]                 | -62.1                                 | -4.7                         | 440.0                   | 125.0                                |
| Ru(acac) <sub>3</sub> | 428.3±0.2 [1]                 | -65.0                                 | 14.6                         | 459.3                   | 130.0                                |
| Rh(acac) <sub>3</sub> | 442±3.0 [4]                   | -67.1                                 | 28.3                         | 473.0                   | 133.6                                |
|                       | <b>429.0±8.0 <sup>f</sup></b> | <b>65.1±1.2 <sup>f</sup></b>          | <b>11.8±8.2 <sup>f</sup></b> |                         |                                      |

<sup>a</sup> Values were obtained by adiabatic calorimetry except Rh(acac)<sub>3</sub> for which the value was get from DSC [4].

<sup>b</sup> Calculated according to equations (6).

<sup>c</sup> Assessed as  $[M] = C_{p,m}^o(\text{cr}) - 3[\text{acac}]$ , where  $[\text{acac}] = 137.9$  J·K<sup>-1</sup>·mol<sup>-1</sup> (see text).

<sup>d</sup> The contribution 31 J·K<sup>-1</sup>·mol<sup>-1</sup> was derived from experimental data on  $C_{p,m}^o(\text{liq})$  and  $C_{p,m}^o(\text{cr})$  for ferrocene [5] and was assumed to be valid for *tris*(acetylacetonato)metal(III) complexes.

<sup>e</sup> Calculated as  $-\Delta_{\text{l}}^g C_{p,m}^o = 10.58 + 0.26C_{p,m}^o(\text{l})$  as suggested by Chickos et al. [6, 7].

<sup>f</sup> Values in bold are weighted mean ones. The uncertainty was used as the weighing factor. Uncertainties are expressed as expanded uncertainties at a level of confidence of 0.95 (k=2).

The  $\Delta_{\text{cr}}^{\text{l}} H_{\text{m}}^o(T_{\text{fus}})$  values have been adjusted to 298.15 K with Equations (S1,S2) [7]:

$$\{ \Delta_{\text{cr}}^{\text{l}} H_{\text{m}}^o(T_{\text{fus}}/\text{K}) - \Delta_{\text{cr}}^{\text{l}} H_{\text{m}}^o(298.15 \text{ K}) \} / (\text{J} \cdot \text{mol}^{-1}) = \Delta_{\text{cr}}^g C_{p,m}^o [(T_{\text{fus}}/\text{K}) - 298.15] - \Delta_{\text{l}}^g C_{p,m}^o [(T_{\text{fus}}/\text{K}) - 298.15] \quad (\text{S1})$$

$$\{\Delta_{\text{cr}}^{\text{l}}S_{\text{m}}^{\text{o}}(T_{\text{fus}}/\text{K}) - \Delta_{\text{cr}}^{\text{l}}S_{\text{m}}^{\text{o}}(298.15 \text{ K})\}/(\text{J}\cdot\text{mol}^{-1} \text{ K}^{-1}) = \Delta_{\text{cr}}^{\text{g}}C_{\text{p,m}}^{\text{o}}\ln\frac{T_{\text{fus}}/\text{K}}{298.15} - \Delta_{\text{l}}^{\text{g}}C_{\text{p,m}}^{\text{o}}\ln\frac{T_{\text{fus}}/\text{K}}{298.15}, \quad (\text{S2})$$

where  $\Delta_{\text{cr}}^{\text{g}}C_{\text{p,m}}^{\text{o}}$  and  $\Delta_{\text{l}}^{\text{g}}C_{\text{p,m}}^{\text{o}}$  have been taken from Table S3. Uncertainties in the temperature adjustment of fusion enthalpies from  $T_{\text{fus}}$  to the reference temperature are estimated to account with 30 % to the total adjustment [8]. The resulted  $\Delta_{\text{cr}}^{\text{l}}H_{\text{m}}^{\text{o}}(298.15 \text{ K})/\Delta_{\text{cr}}^{\text{l}}S_{\text{m}}^{\text{o}}(298.15 \text{ K})$  values are listed in Table S4.

**Table S4.** Compilation of available experimental fusion temperatures and standard molar enthalpies of fusion,  $\Delta_{\text{cr}}^{\text{l}}H_{\text{m}}^{\text{o}}(T_{\text{fus}})$ , and calculated from these data entropies of fusion,  $\Delta_{\text{cr}}^{\text{l}}S_{\text{m}}^{\text{o}}(T_{\text{fus}})$ , for *tris*(acetylacetonato)metal(III) complexes <sup>a</sup>.

| Complex               | $T_{\text{fus}}, \text{K}$ | $\Delta_{\text{cr}}^{\text{l}}H_{\text{m}}^{\text{o}}(T_{\text{fus}}),$<br>$\text{kJ}\cdot\text{mol}^{-1}$ | $\Delta_{\text{cr}}^{\text{l}}S_{\text{m}}^{\text{o}}(T_{\text{fus}}),$<br>$\text{J}\cdot\text{mol}^{-1} \text{ K}^{-1}$ | $\Delta_{\text{cr}}^{\text{l}}H_{\text{m}}^{\text{o}}(298.15 \text{ K}),^{\text{b}}$<br>$\text{kJ}\cdot\text{mol}^{-1}$ | $\Delta_{\text{cr}}^{\text{l}}S_{\text{m}}^{\text{o}}(298.15 \text{ K}),^{\text{b}}$<br>$\text{J}\cdot\text{mol}^{-1} \text{ K}^{-1}$ | Ref             |
|-----------------------|----------------------------|------------------------------------------------------------------------------------------------------------|--------------------------------------------------------------------------------------------------------------------------|-------------------------------------------------------------------------------------------------------------------------|---------------------------------------------------------------------------------------------------------------------------------------|-----------------|
| Al(acac) <sub>3</sub> | 463.7                      | 35.2±0.6                                                                                                   | 75.9±1.3                                                                                                                 | 24.4±3.3                                                                                                                | 47.1±6.4                                                                                                                              | [9]             |
|                       | 469                        | 35.0±2.0                                                                                                   | 74.6±4.3                                                                                                                 | 23.9±3.9                                                                                                                | 45.1±7.4                                                                                                                              | [10]            |
|                       | 460                        | 32.7±0.3                                                                                                   | 71.1±0.7                                                                                                                 | 22.2±3.2                                                                                                                | 42.8±6.1                                                                                                                              | [10]            |
|                       | 466.7±0.2                  | 32.7±0.3                                                                                                   | 71.1±0.7                                                                                                                 | 22.2±3.2                                                                                                                | 42.8±6.1                                                                                                                              | [11]            |
|                       | 467.8                      | (28.7±1.3)                                                                                                 | (61.4±2.8)                                                                                                               | (17.6±3.6)                                                                                                              | (32.0±6.5)                                                                                                                            | [12]            |
|                       |                            |                                                                                                            |                                                                                                                          | <b>23.2±1.7<sup>c</sup></b>                                                                                             | <b>44.4±3.3<sup>c</sup></b>                                                                                                           | this work       |
| Cr(acac) <sub>3</sub> | 488.9±0.5                  | 34.0±0.3                                                                                                   | 69.5±0.6                                                                                                                 | 21.6±3.7                                                                                                                | 37.3±6.5                                                                                                                              | [11]            |
|                       | 486                        | 35.9±1.0                                                                                                   | 73.9±2.1                                                                                                                 | 23.6±3.8                                                                                                                | 42.0±6.8                                                                                                                              | [9]             |
|                       | 494                        | 35.2±0.2                                                                                                   | 71.3±0.4                                                                                                                 | 22.4±3.8                                                                                                                | 38.3±6.6                                                                                                                              | [10]            |
|                       | 487                        | (28.1±1.3)                                                                                                 | (57.7±2.7)                                                                                                               | (15.8±3.9)                                                                                                              | (25.7±6.4)                                                                                                                            | [13]            |
|                       | 489                        | (28.0±1.0)                                                                                                 | (57.3±2.0)                                                                                                               | (15.6±3.9)                                                                                                              | (25.0±6.2)                                                                                                                            | [2]             |
|                       |                            |                                                                                                            |                                                                                                                          | <b>22.5±2.2<sup>c</sup></b>                                                                                             | <b>39.1±3.8<sup>c</sup></b>                                                                                                           | this work       |
| Sc(acac) <sub>3</sub> | 460                        | 28.8±1.0                                                                                                   | 62.6±2.2                                                                                                                 | 18.3±3.3                                                                                                                | 34.6±6.2                                                                                                                              | [2]             |
|                       | 461.2±0.3                  | 25.6±0.5                                                                                                   | 55.5±1.1                                                                                                                 | 15.1±3.3                                                                                                                | 27.3±5.8                                                                                                                              | [14]            |
|                       |                            |                                                                                                            |                                                                                                                          | <b>16.7±2.3<sup>c</sup></b>                                                                                             | <b>30.7±4.2<sup>c</sup></b>                                                                                                           | [15], this work |
| Fe(acac) <sub>3</sub> | 461                        | 34.1±0.9                                                                                                   | 74.0±2.0                                                                                                                 | 23.5±3.3                                                                                                                | 45.6±6.4                                                                                                                              | [10]            |
|                       | 458.8                      | 30.1±0.5                                                                                                   | 65.6±1.1                                                                                                                 | 19.6±3.2                                                                                                                | 37.5±6.1                                                                                                                              | [9]             |
|                       |                            |                                                                                                            |                                                                                                                          | <b>21.5±2.3<sup>c</sup></b>                                                                                             | <b>41.4±4.4<sup>c</sup></b>                                                                                                           | [16], this work |
| Mn(acac) <sub>3</sub> | 421.9                      | 27.7±1.0                                                                                                   | 65.7±2.4                                                                                                                 | <b>19.7±2.6</b>                                                                                                         | <b>43.2±5.7</b>                                                                                                                       | [9]             |
| Ru(acac) <sub>3</sub> | 503.9                      | 25.0±0.6                                                                                                   | 49.6±1.2                                                                                                                 | <b>11.4±4.1</b>                                                                                                         | <b>15.0±5.4</b>                                                                                                                       | [17]            |

<sup>a</sup> Uncertainties in this table are expressed as expanded uncertainties at a level of confidence of 0.95 (k=2). Values in parenthesis were excluded from the consideration as doubtful.

<sup>b</sup> The enthalpies and entropies of fusion  $\Delta_{\text{cr}}^{\text{l}}H_{\text{m}}^{\text{o}}/\Delta_{\text{cr}}^{\text{l}}S_{\text{m}}^{\text{o}}$  at  $T_{\text{fus}}$  were adjusted to 298.15 K (see Equations (S1, S2)). Uncertainties in the temperature adjustment of fusion enthalpies from  $T_{\text{fus}}$  to the reference temperature are estimated to account with 30 % to the total adjustment [8].

<sup>c</sup> Weighted mean value. We used the experimental uncertainty as the weighing factor.

**Table S5.** The experimental vapor pressure points for Mn(acac)<sub>3</sub> and Co(acac)<sub>3</sub> obtained by Knudsen effusion method with mass spectrometric registration of the gas phase composition which were used for the estimation of volatility in [18] but not published in original literary source <sup>a</sup>.

| Mn(acac) <sub>3</sub> |                            | Co(acac) <sub>3</sub> |                            |
|-----------------------|----------------------------|-----------------------|----------------------------|
| <i>T</i> , K          | <i>p</i> <sub>i</sub> , Pa | <i>T</i> , K          | <i>p</i> <sub>i</sub> , Pa |
| 340.0                 | 0.003                      | 350.0                 | 0.008                      |
| 347.0                 | 0.009                      | 356.0                 | 0.015                      |
| 351.0                 | 0.013                      | 362.0                 | 0.031                      |
| 359.0                 | 0.033                      | 379.0                 | 0.179                      |
| 364.0                 | 0.075                      | 388.0                 | 0.433                      |
| 372.0                 | 0.160                      | 392.0                 | 0.634                      |
| 376.0                 | 0.304                      | 408.0                 | 2.61                       |
| 386.0                 | 0.946                      | 415.0                 | 5.11                       |
| 396.0                 | 2.27                       |                       |                            |
| 400.0                 | 3.18                       |                       |                            |

<sup>a</sup> Standard uncertainty *u* is *u*(*T*) = 1.0 K; relative standard uncertainty for vapor pressure *u<sub>r</sub>*(*p<sub>i</sub>*) = 0.15·*p<sub>i</sub>*.

**Table S6.** Compilation of enthalpies,  $\Delta_{\text{cr,l}}^{\text{g}}H_{\text{m}}^{\circ}$ , and entropies,  $\Delta_{\text{cr,l}}^{\text{g}}S_{\text{m}}^{\circ}$ , of phase transitions available for *tris*(acetylacetonato)metal(III) complexes at 298.15 K <sup>a</sup>.

| Complex               | <i>M</i> , g | $\Delta_{\text{cr}}^{\text{g}}H_{\text{m}}^{\circ}$ <sup>b</sup> , kJ·mol <sup>-1</sup> | $\Delta_{\text{l}}^{\text{g}}H_{\text{m}}^{\circ}$ <sup>b</sup> , kJ·mol <sup>-1</sup> | $\Delta_{\text{cr}}^{\text{g}}S_{\text{m}}^{\circ}$ <sup>b</sup> , J·mol <sup>-1</sup> K <sup>-1</sup> | $\Delta_{\text{l}}^{\text{g}}S_{\text{m}}^{\circ}$ <sup>b</sup> , J·mol <sup>-1</sup> K <sup>-1</sup> |
|-----------------------|--------------|-----------------------------------------------------------------------------------------|----------------------------------------------------------------------------------------|--------------------------------------------------------------------------------------------------------|-------------------------------------------------------------------------------------------------------|
| 1                     | 2            | 3                                                                                       |                                                                                        |                                                                                                        | 1                                                                                                     |
| Al(acac) <sub>3</sub> | 324.30       | 123.9±0.9                                                                               | 104.2±1.6                                                                              | 236.4±1.6                                                                                              | 199.4±6.2                                                                                             |
|                       |              |                                                                                         | 100.7±1.9                                                                              |                                                                                                        | 192.0±3.7                                                                                             |
|                       |              |                                                                                         | <b>102.7±1.2</b> <sup>c</sup>                                                          |                                                                                                        | <b>193.9±3.2</b> <sup>c</sup>                                                                         |
| Cr(acac) <sub>3</sub> | 349.32       | 129.6±0.9                                                                               | 111.1±2.0                                                                              | 236.2±1.7                                                                                              | 206.1±6.7                                                                                             |
|                       |              |                                                                                         | 107.1±2.4                                                                              |                                                                                                        | 197.1±4.2                                                                                             |
|                       |              |                                                                                         | <b>109.5±1.5</b> <sup>c</sup>                                                          |                                                                                                        | <b>199.6±3.6</b> <sup>c</sup>                                                                         |
| In(acac) <sub>3</sub> | 412.14       | 134.0±2.9                                                                               |                                                                                        | 250.4±5.2                                                                                              |                                                                                                       |
| Sc(acac) <sub>3</sub> | 342.28       | 126.4±1.1                                                                               | 111.3±5.0                                                                              | 236.7±2.7                                                                                              | 208.5±8.6                                                                                             |
|                       |              |                                                                                         | 109.7±2.5                                                                              |                                                                                                        | 206.0±5.0                                                                                             |
|                       |              |                                                                                         | <b>110.0±2.2</b> <sup>c</sup>                                                          |                                                                                                        | <b>206.6±4.3</b> <sup>c</sup>                                                                         |
| Fe(acac) <sub>3</sub> | 353.17       | 130.6±1.7                                                                               | 110.8±8.9                                                                              | 244.4±3.3                                                                                              | 226±20                                                                                                |
|                       |              |                                                                                         | 109.1±2.9                                                                              |                                                                                                        | 203.0±5.5                                                                                             |
|                       |              |                                                                                         | <b>109.3±2.8</b> <sup>c</sup>                                                          |                                                                                                        | <b>204.6±5.3</b> <sup>c</sup>                                                                         |
| Ir(acac) <sub>3</sub> | 489.54       | 136.8±1.4                                                                               |                                                                                        | 234.3±2.8                                                                                              |                                                                                                       |
| Mn(acac) <sub>3</sub> | 421.9        | 131.3±3.1                                                                               | 111.6±4.0                                                                              | 249.6±5.8                                                                                              | 206.4±8.1                                                                                             |
| Co(acac) <sub>3</sub> | 356.26       | 129.2±2.6                                                                               |                                                                                        | 241.0±6.0                                                                                              |                                                                                                       |
| Ru(acac) <sub>3</sub> | 398.39       | 137.4±1.6                                                                               | 126.0±4.4                                                                              | 238.3±3.9                                                                                              | 223.3±6.7                                                                                             |
| Rh(acac) <sub>3</sub> | 400.23       | 135.7±1.1                                                                               |                                                                                        | 230.5±2.5                                                                                              |                                                                                                       |
|                       |              |                                                                                         |                                                                                        | <b>238±8</b> <sup>d</sup>                                                                              | <b>205±12</b> <sup>d</sup>                                                                            |

<sup>a</sup> Uncertainties in this table are expressed as expanded uncertainties at a level of confidence of 0.95 (*k*=2).

<sup>b</sup> From Table 2, columns 5 and 6, in bold.

<sup>c</sup> Vaporization enthalpy and entropy values are calculated as average weighted value of both figures in bold in Table 2 (columns 5 and 6).

<sup>d</sup> Average weighted value.

## References

1. Bespyatov, M.A. Low-temperature heat capacity and thermodynamic functions of tetrameric cobalt(II) acetylacetonate. *J. Chem. Eng. Data* **2020**, *65*, 5218–5225. <https://doi.org/10.1021/acs.jced.0c00391>.
2. Melia, T.P.; Merrifield, R. Thermal properties of transition metal compounds: Heat capacity, entropy, enthalpy, free energy and heat of fusion of the tris(acetylacetonato)complexes of scandium(III), vanadium(III), manganese(III), iron(III) and cobalt(III) and the vapour pressure of tris(acetylacetonato)iron (III)–IV. *J. Inorg. Nucl. Chem.* **1970**, *32*, 2573–2579. [https://doi.org/10.1016/0022-1902\(70\)80304-9](https://doi.org/10.1016/0022-1902(70)80304-9).
3. Zhilina, M.N.; Karyakin, N.V.; Maslova, V.A.; Shvetsova, K.G.; Busygina, G.I.; Nikolaev, P.N. Heat capacity and thermodynamic functions of iron(III) acetylacetonate. *Russ. J. Phys. Chem.* **1987**, *61*, 1633–1634.
4. Zherikova, K.V.; Zelenina, L.N.; Pishchur, D.P.; Emel'yanenko, V.N.; Shoifet, E.; Schick, C.; Verevkin, S.P.; Gelfond, N.V.; Morozova, N.B. Thermochemical study of rhodium(III) acetylacetonate. *J. Chem. Thermodyn.* **2016**, *102*, 442–450. <https://doi.org/10.1016/j.jct.2016.07.031>.
5. Zherikova, K.V.; Verevkin, S.P. Ferrocene: Temperature adjustments of sublimation and vaporization enthalpies. *Fluid Phase Equilib.* **2018**, *472*, 196–203. <https://doi.org/10.1016/j.fluid.2018.05.004>.
6. Chickos, J.S.; Hosseini, S.; Hesse, D.G.; Liebman, J.F. Heat capacity corrections to a standard state: a comparison of new and some literature methods for organic liquids and solids. *Struct. Chem.* **1993**, *4*, 261–269. <https://doi.org/10.1007/BF00673701>.
7. Acree, W.; Chickos, J.S. Phase transition enthalpy measurements of organic and organometallic compounds. sublimation, vaporization and fusion enthalpies from 1880 to 2015. Part 1. C<sub>1</sub> - C<sub>10</sub>. *J. Phys. Chem. Ref. Data* **2016**, *45*, 033101. <http://dx.doi.org/10.1063/1.4948363>.
8. Gobble, C.; Chickos, J.; Verevkin, S.P. Vapor pressures and vaporization enthalpies of a series of dialkyl phthalates by correlation gas chromatography. *J. Chem. Eng. Data* **2014**, *59*, 1353–1365. <https://doi.org/10.1021/je500110d>.
9. Sabolović, J.; Mrak, Ž.; Koštrun, S.; Janeković, A. Is the enthalpy of fusion of tris(acetylacetonato)metal(III) complexes affected by their potential energy in the crystal state? *Inorg. Chem.* **2004**, *43*, 8479–8489. <https://doi.org/10.1021/ic048900u>.
10. Beech, G.; Lintonbon, R.M. Thermal and kinetic studies of some metal complexes of 2,4-pentanedione. *Thermochim. Acta* **1971**, *3*, 97–105. [https://doi.org/10.1016/0040-6031\(71\)80003-5](https://doi.org/10.1016/0040-6031(71)80003-5).
11. Lazarev, V.B.; Greenberg, J.H.; Ozerova, Z.P.; Sharpataya, G.A. DSC and vapour pressure investigation of some  $\beta$ -diketonates. *J. Therm. Anal.* **1988**, *33*, 797–799. <https://doi.org/10.1007/BF02138589>.
12. Murray, J.P.; Hill, J.O. DSC determination of the fusion and sublimation enthalpy of bis(2,4-pentanedionato)beryllium(II) and tris(2,4-pentanedionato)aluminium(III). *Thermochim. Acta* **1983**, *63*, 211–218. [https://doi.org/10.1016/0040-6031\(83\)80086-0](https://doi.org/10.1016/0040-6031(83)80086-0).
13. Murray, J.P.; Hill, J.O. DSC determination of the fusion and sublimation enthalpy of tris(2,4-pentanedionato)Cr(III) and Fe(III). *Thermochim. Acta* **1984**, *72*, 341–347. [https://doi.org/10.1016/0040-6031\(84\)85092-3](https://doi.org/10.1016/0040-6031(84)85092-3).
14. Zelenina, L.N.; Zherikova, K.V.; Chusova, T.P.; Trubin, S.V.; Bredikhin, R.A.; Gelfond, N.V.; Morozova, N.B. Comprehensive thermochemical study of sublimation, melting and vaporization of scandium(III) beta-diketonates. *Thermochim. Acta* **2020**, *689*, 178639. <https://doi.org/10.1016/j.tca.2020.178639>.
15. Makarenko, A.M.; Zaitsau, D.H.; Zherikova, K.V. Metal-organic chemical vapor deposition precursors: diagnostic check for volatilization thermodynamics of scandium(III)  $\beta$ -diketonates. *Coatings* **2023**, *13*, 535. <https://doi.org/10.3390/coatings13030535>.
16. Zherikova, K.V.; Verevkin, S.P. Error or exemption to the rule? Development of a diagnostic check for thermochemistry of metal–organic compounds. *RSC Adv.* **2020**, *10*, 38158. <https://doi.org/10.1039/D0RA06880B>.
17. Zherikova, K.V.; Zelenina, L.N.; Morozova, N.B.; Chusova, T.P. Thermal properties of volatile ruthenium(III) complexes. *J. Therm. Anal. Calorim.* **2011**, *108*, 1325–1329. <https://doi.org/10.1007/s10973-011-2009-4>.
18. Semyannikov, P.P.; Igumenov, I.K.; Trubin, S.V.; Asanov, I.P. In situ mass spectrometry during thermal CVD of the tris-acetylacetonates of 3-d transition metals. *J. Phys. IV* **2001**, *11*, 995–1003. <https://doi.org/10.1051/jp4:20013125>.
